# Supplementary material for: Ameliorative Effects of Flavonoids from Platycodon grandiflorus Aerial Parts on Alloxan-Induced Pancreatic Islet Damage in Zebrafish
Source: MDPI journal article supplement (doi:10.3390/nu15071798), 2023-04-06
Supplement: s1 [file s1]

## SUPPORTING INFORMATION

### Ameliorative Effects of Flavonoids from *Platycodon grandiflorus* Aerial Part on Alloxan-Induced Pancreatic Islet Damage in Zebrafish

Youn Hee Nam <sup>1,†</sup>, Eun Bin Kim <sup>2,†</sup>, Ji Eun Kang <sup>2</sup>, Ju Su Kim <sup>2</sup>, Yukyoung Jeon <sup>2</sup>, Sung Woo Shin <sup>1</sup>, Tong Ho Kang <sup>1,\*</sup>, and Jong Hwan Kwak <sup>2,\*</sup>

<sup>1</sup> Department of Oriental Medicine Biotechnology, College of Life Sciences and Graduate School of Biotechnology, Kyung Hee University, Global Campus, Gyeonggi 17104, Korea

<sup>2</sup> School of Pharmacy, Sungkyunkwan University, Suwon, Gyeonggi-do 16419, Republic of Korea

\* Correspondence: panjae@khu.ac.kr (T.H.K.); jhkwak@skku.edu (J.H.K.); Tel.: +82-31-201-3862 (T.H.K.); +82-31-290-7745(J.H.K.); Fax: +82-303-0300-0030 (T.H.K.); +82-31-292-8800 (J.H.K.)

† These two authors contributed equally to this work.

#### List of Contents

**Figure S1.** ESIMS (positive ion mode) spectrum of compound **1**.

**Figure S2.** FABMS (positive ion mode) spectrum of compound **1**.

**Figure S3.** HRFABMS (positive ion mode) spectrum of compound **1**.

**Figure S4.** <sup>1</sup>H NMR spectrum of compound **1** (CD<sub>3</sub>OD, 700 MHz).

**Figure S5.** <sup>13</sup>C NMR spectrum of compound **1** (CD<sub>3</sub>OD, 176 MHz).

**Figure S6.** <sup>1</sup>H-<sup>1</sup>H COSY spectrum of compound **1** (CD<sub>3</sub>OD, 700 MHz).

**Figure S7.** HSQC spectrum of compound **1** (CD<sub>3</sub>OD, 700 MHz).

**Figure S8.** HMBC spectrum of compound **1** (CD<sub>3</sub>OD, 700 MHz).

**Figure S9.** ESIMS (positive ion mode) spectrum of compound **2**.

**Figure S10.** FABMS (positive ion mode) spectrum of compound **2**.

**Figure S11.** HRFABMS (positive ion mode) spectrum of compound **2**.

**Figure S12.** <sup>1</sup>H NMR spectrum of compound **2** (DMSO-*d*<sub>6</sub>, 700 MHz).

**Figure S13.** <sup>13</sup>C NMR spectrum of compound **2** (DMSO-*d*<sub>6</sub>, 176 MHz).

**Figure S14.** <sup>1</sup>H-<sup>1</sup>H COSY spectrum of compound **2** (DMSO-*d*<sub>6</sub>, 700 MHz).

**Figure S15.** HSQC spectrum of compound **2** (DMSO-*d*<sub>6</sub>, 700 MHz).

**Figure S16.** HMBC spectrum of compound **2** (DMSO-*d*<sub>6</sub>, 700 MHz).

00097-01-0-SQD1-Bu-7F-27 120 (0.477)

1: Scan ES+  
1.72e7

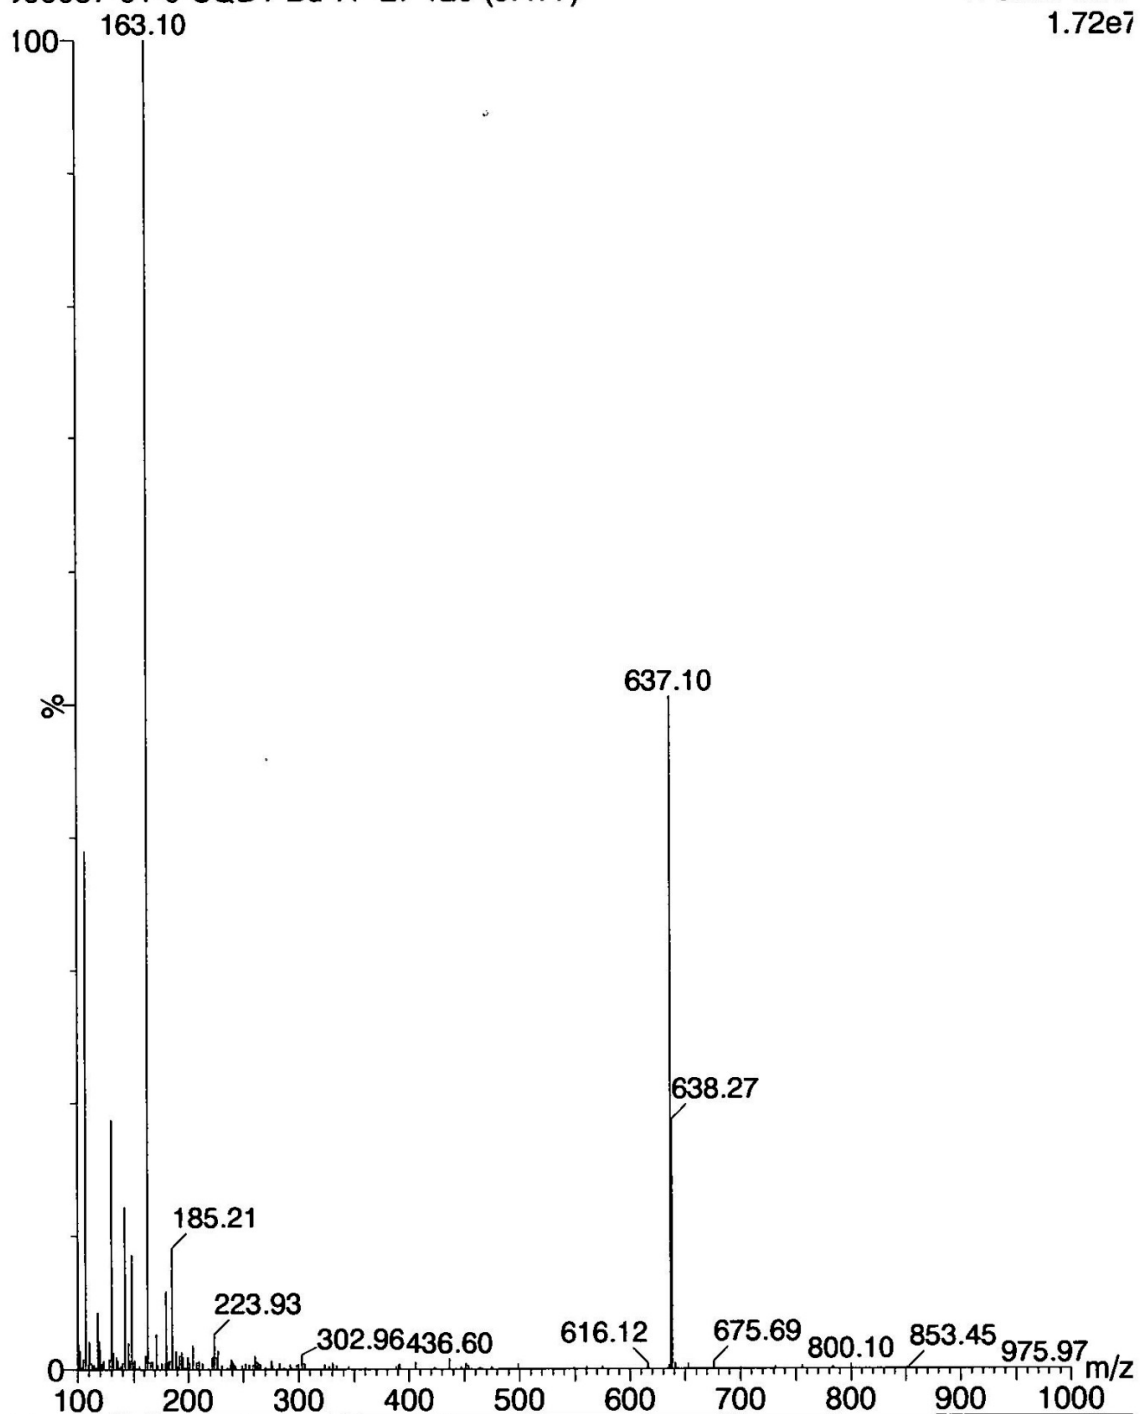

**Figure S1.** ESIMS (positive ion mode) spectrum of compound **1**.

[ Mass Spectrum ]  
 Date : 20160415-Pg-A-003 Date : 15-Apr-2016 15:25  
 Sample :  
 Note : Jeol-JMS-700  
 Inlet : Direct Ion Mode : FAB+  
 Spectrum Type : Normal Ion [MF-Linear]  
 RT : 0.34 min Scan# : 11  
 BP : m/z 92.9715 Int. : 400.00  
 Output m/z range : 50.0000 to 821.8101 Cut Level : 0.00 %  
 4502704

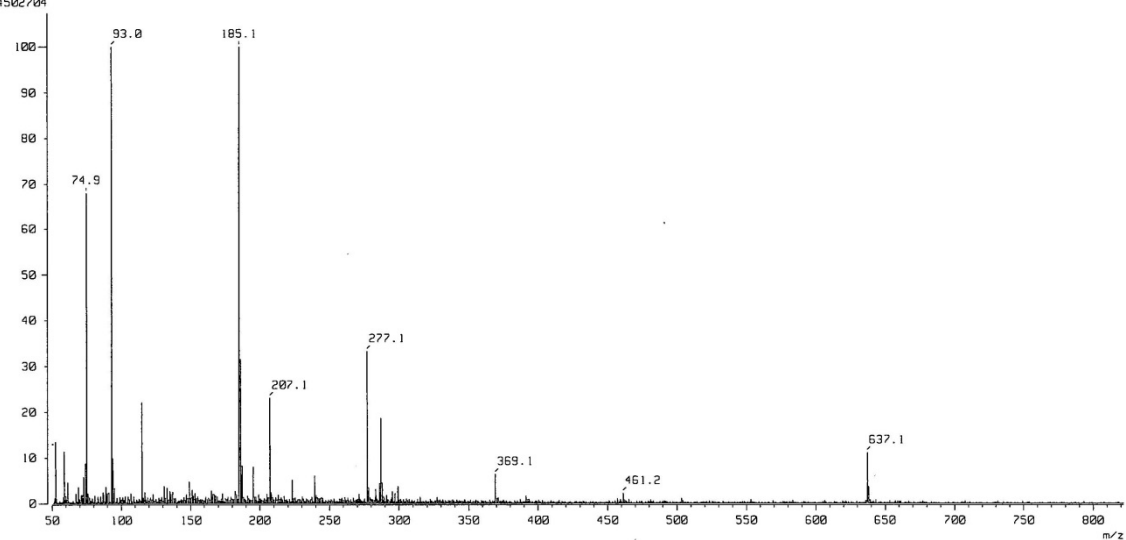

**Figure S2.** FABMS (positive ion mode) spectrum of compound **1**.

[ Mass Spectrum ]  
 Data : 20160415-HR-Pg-A-1-006 Date : 15-Apr-2016 15:42  
 Sample : -  
 Note : -  
 Inlet : Direct Ion Mode : FAB+  
 Spectrum Type : Normal Ion [MF-Linear]  
 RT : 1.97 min Scan# : 60  
 BP : m/z 637.1770 Int. : 1599.92  
 Output m/z range : 637.0669 to 637.4200 Cut Level : 0.00 %  
 18973376

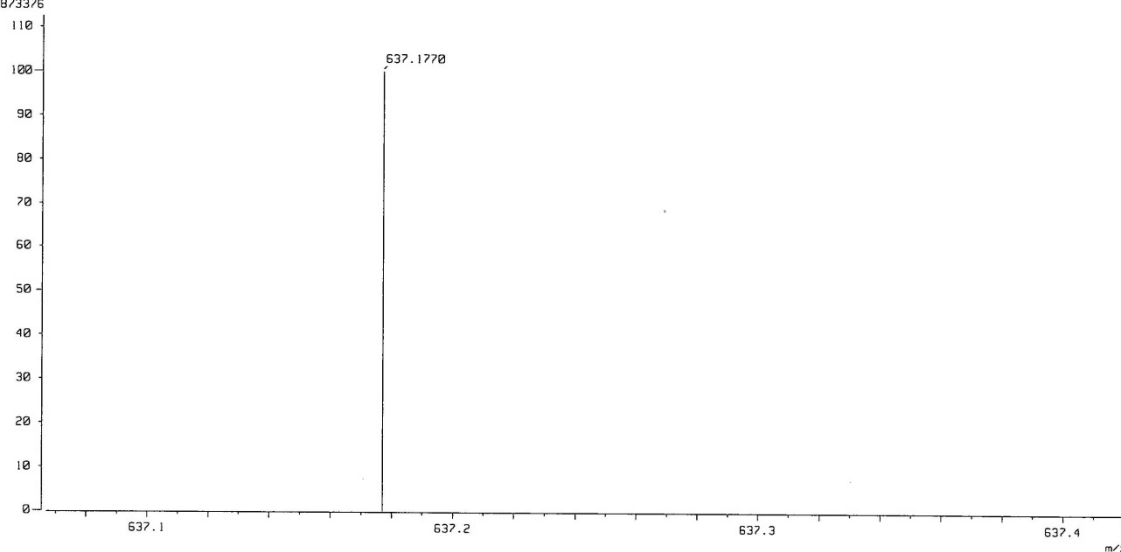

**Figure S3.** HRFABMS (positive ion mode) spectrum of compound **1**.

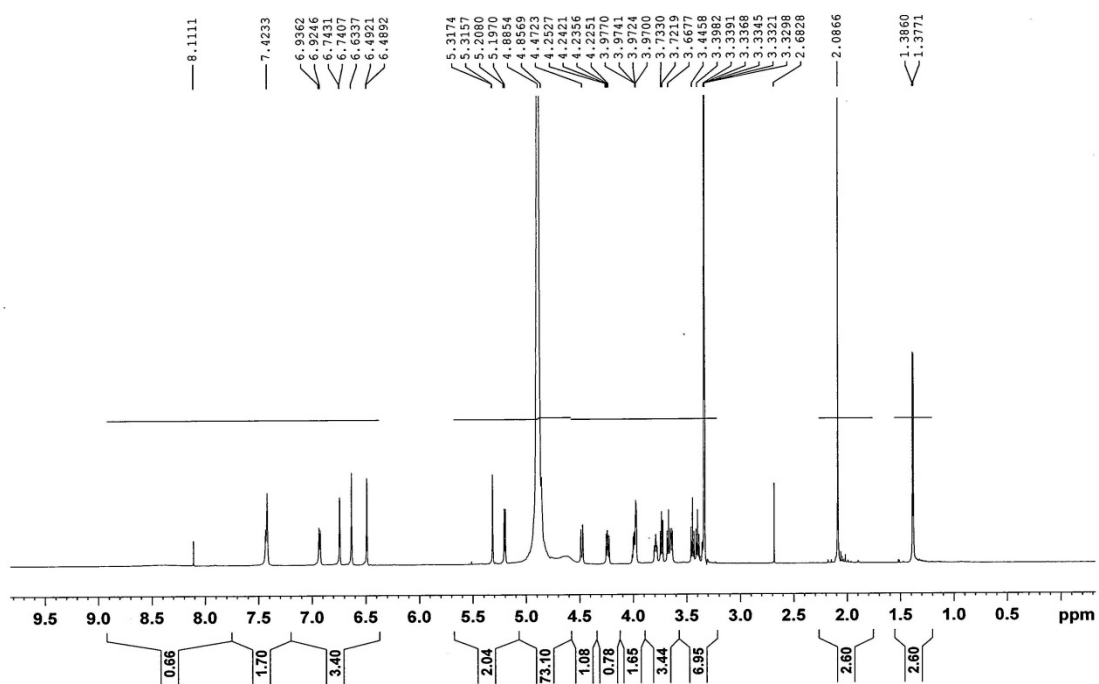

**Figure S4.** <sup>1</sup>H NMR spectrum of compound **1** (CD<sub>3</sub>OD, 700 MHz).

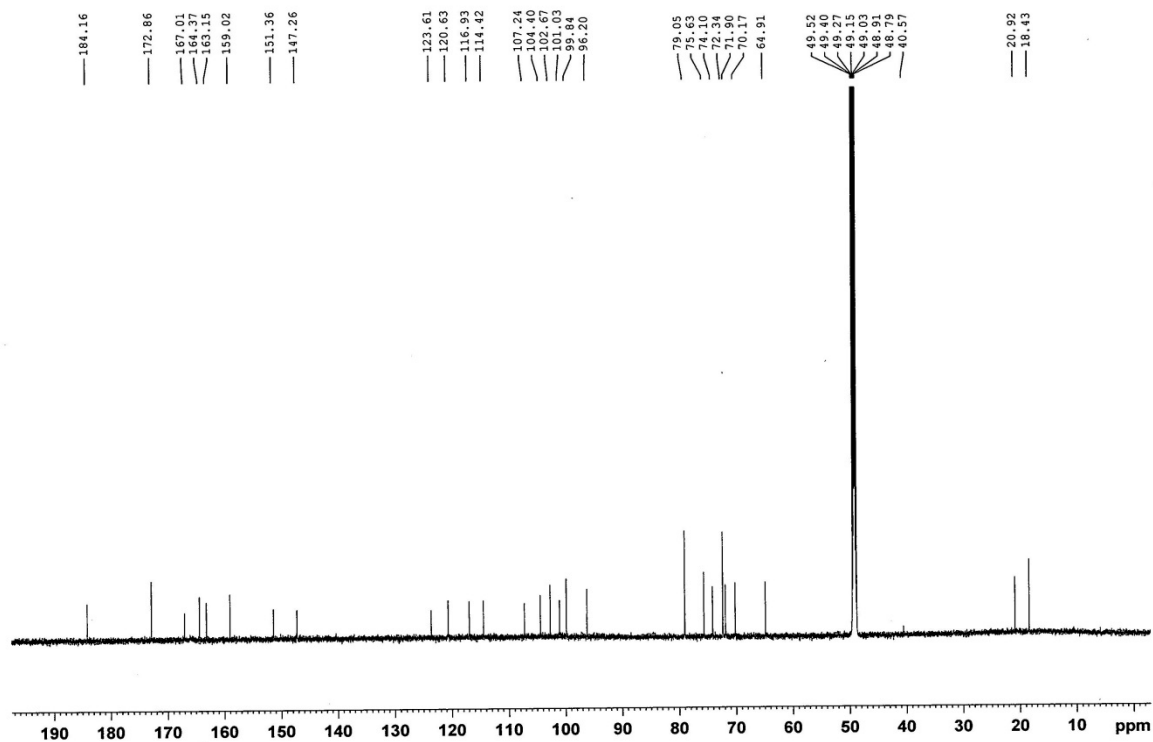

**Figure S5.** <sup>13</sup>C NMR spectrum of compound **1** (CD<sub>3</sub>OD, 176 MHz).

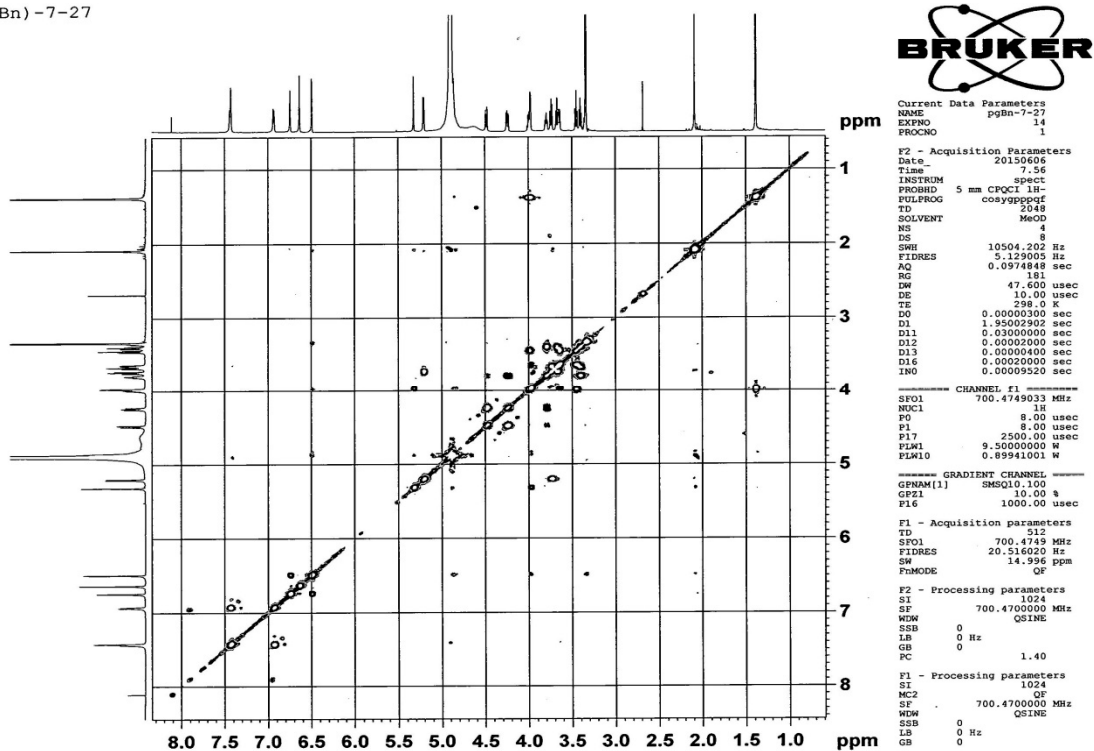Figure S6.  $^1\text{H}$ - $^1\text{H}$  COSY spectrum of compound **1** ( $\text{CD}_3\text{OD}$ , 700 MHz).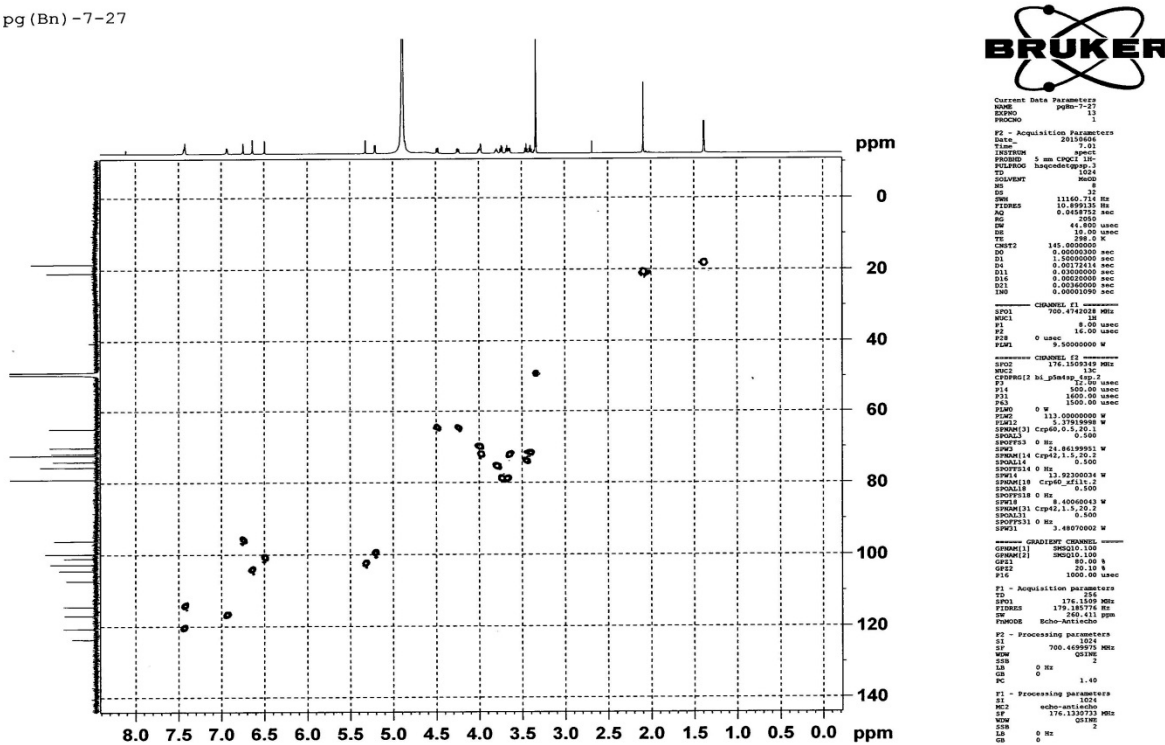Figure S7. HSQC spectrum of compound **1** ( $\text{CD}_3\text{OD}$ , 700 MHz).

pg (Bn) -7-27

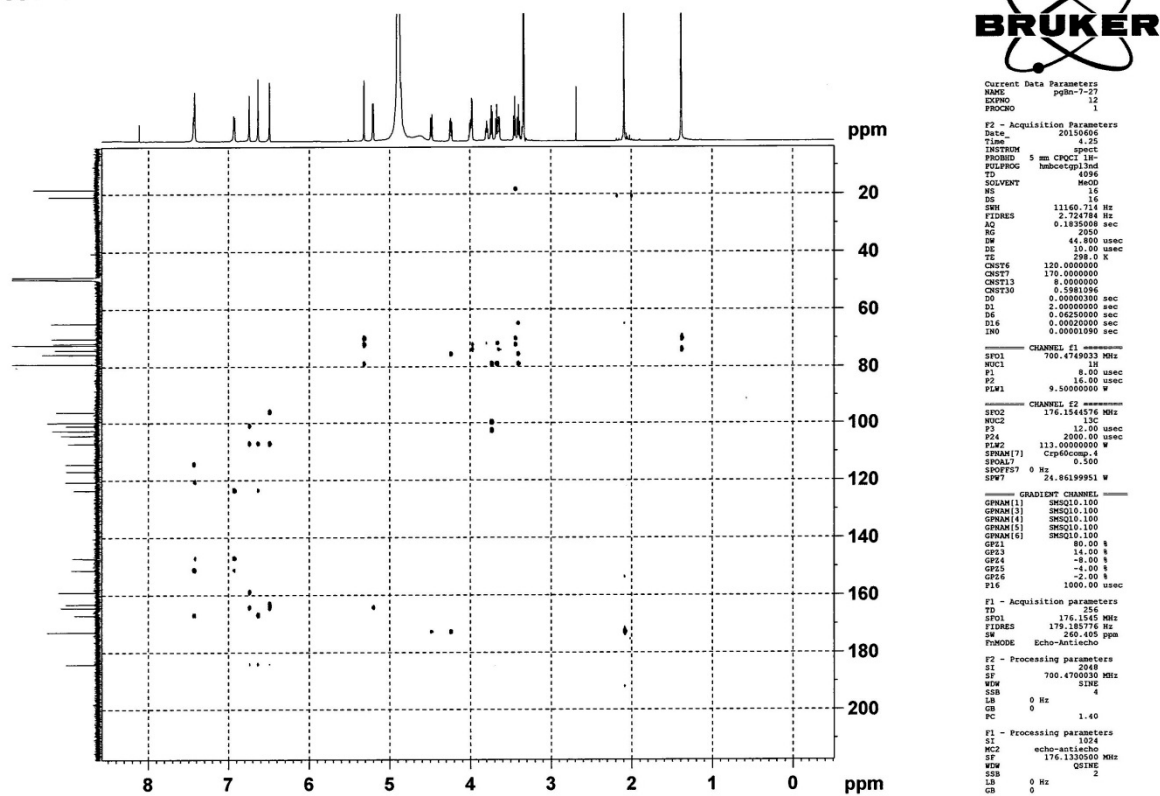

**Figure S8.** HMBC spectrum of compound **1** (CD<sub>3</sub>OD, 700 MHz).

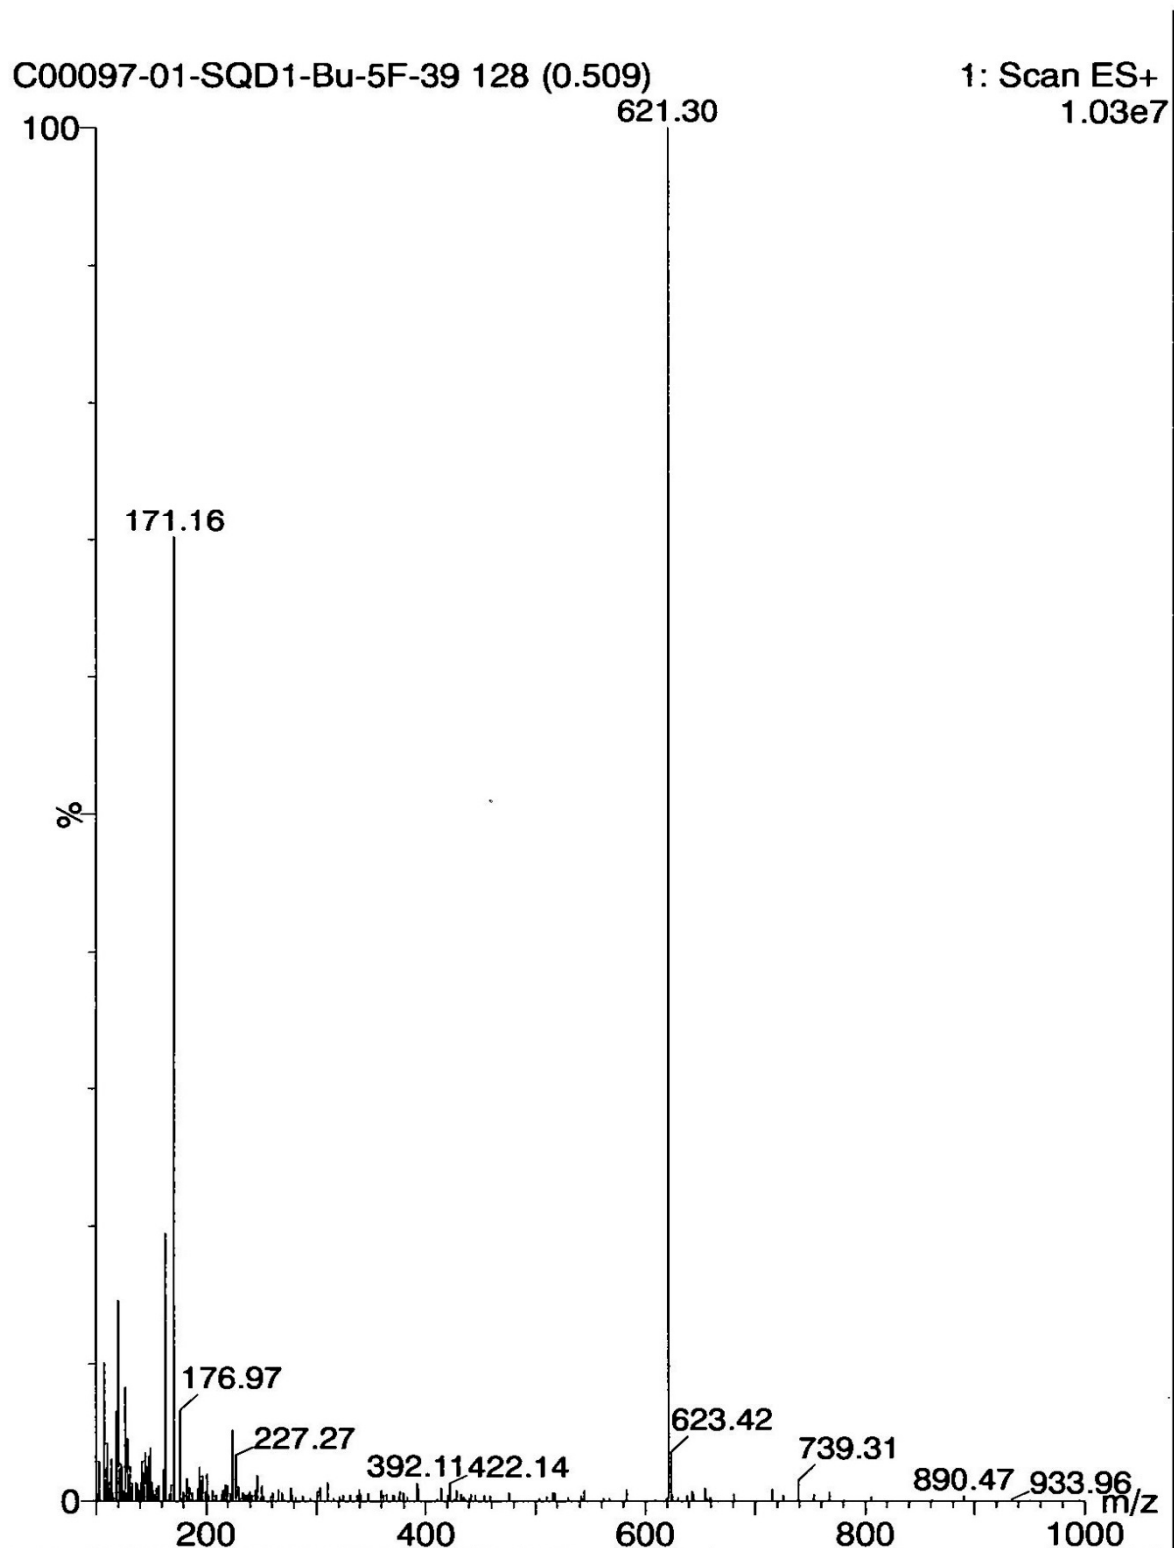

**Figure S9.** ESIMS (positive ion mode) spectrum of compound **2**.

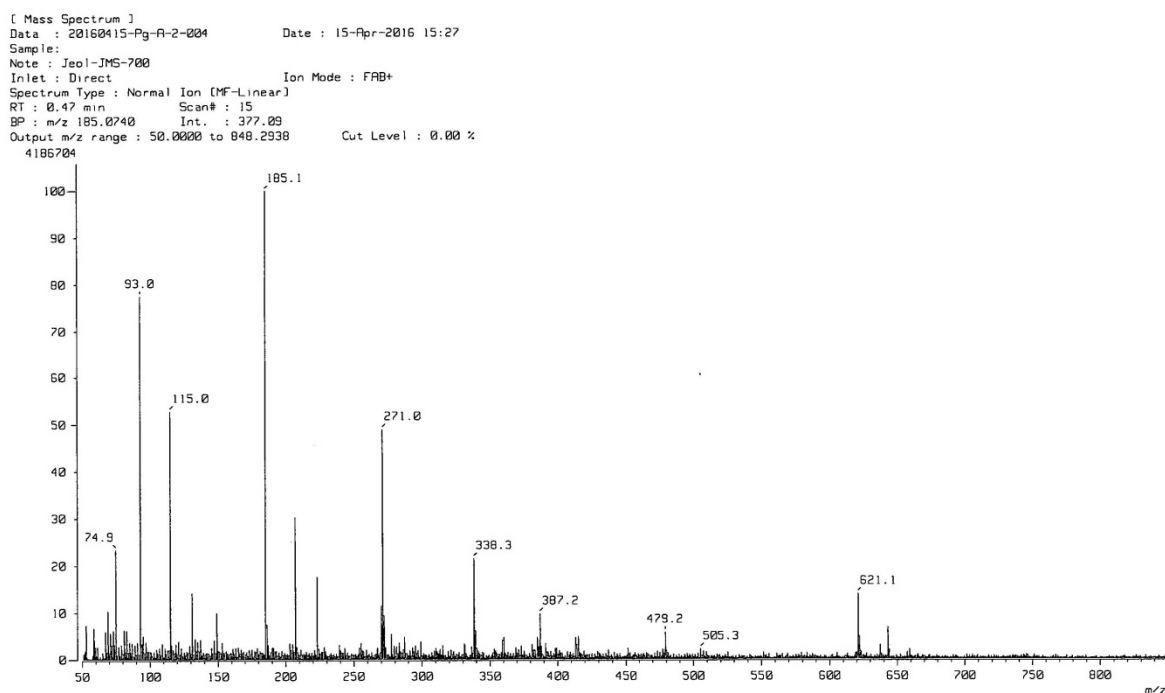

**Figure S10.** FABMS (positive ion mode) spectrum of compound **2**.

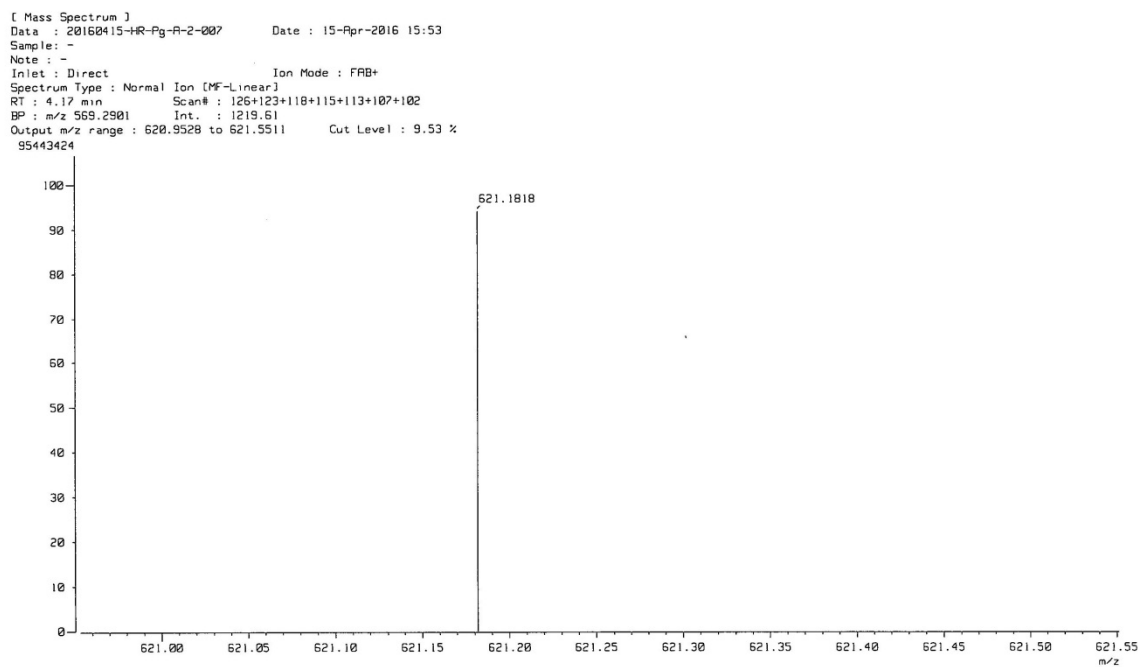

**Figure S11.** HRFABMS (positive ion mode) spectrum of compound **2**.



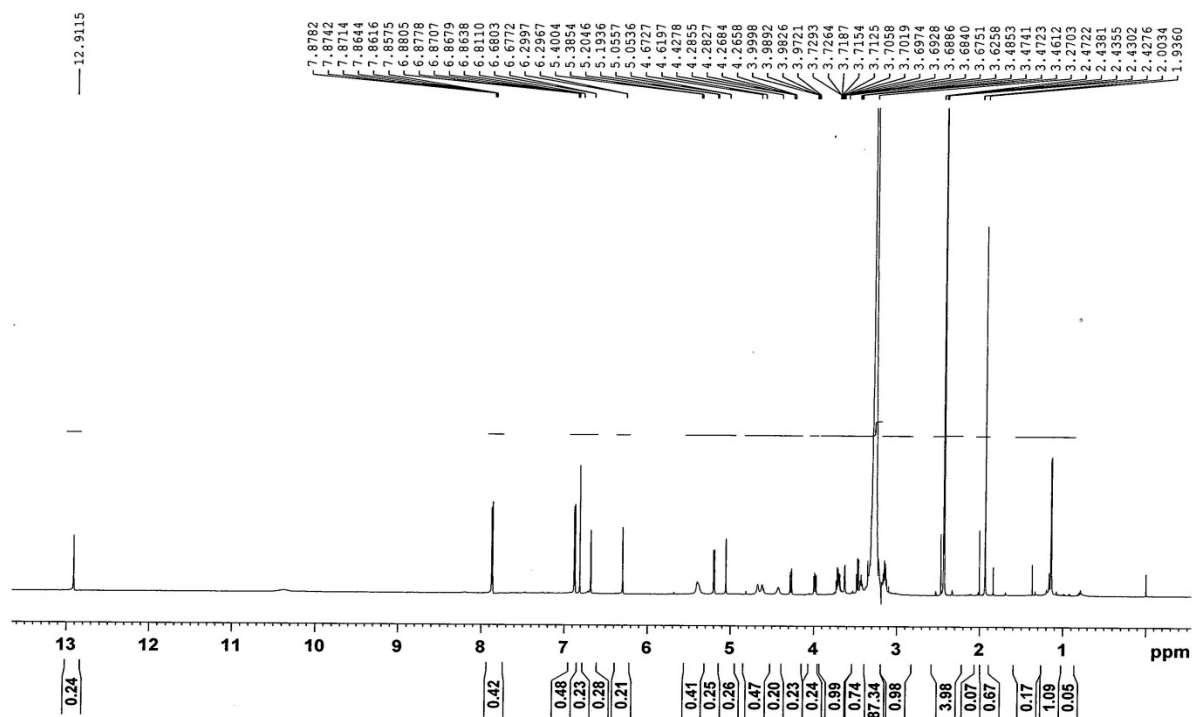

**Figure S12.**  $^1\text{H}$  NMR spectrum of compound **2** (DMSO- $d_6$ , 700 MHz).

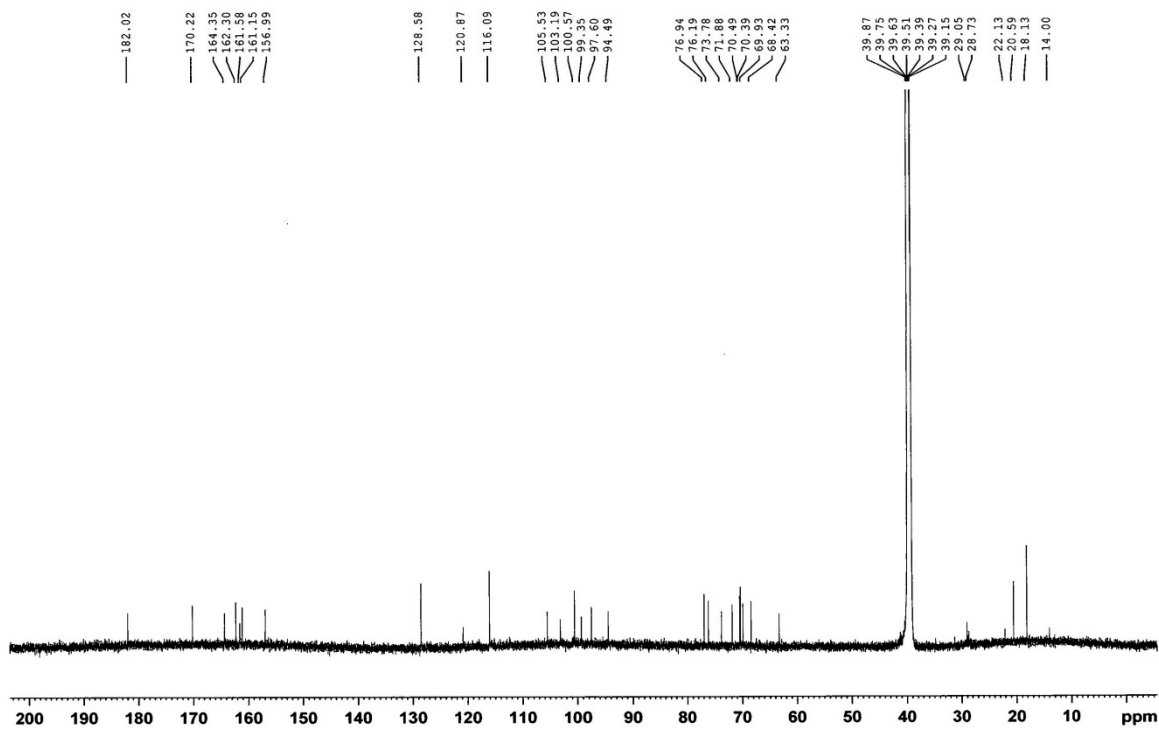

**Figure S13.**  $^{13}\text{C}$  NMR spectrum of compound **2** (DMSO- $d_6$ , 176 MHz).

pg (Bn) -5-.39

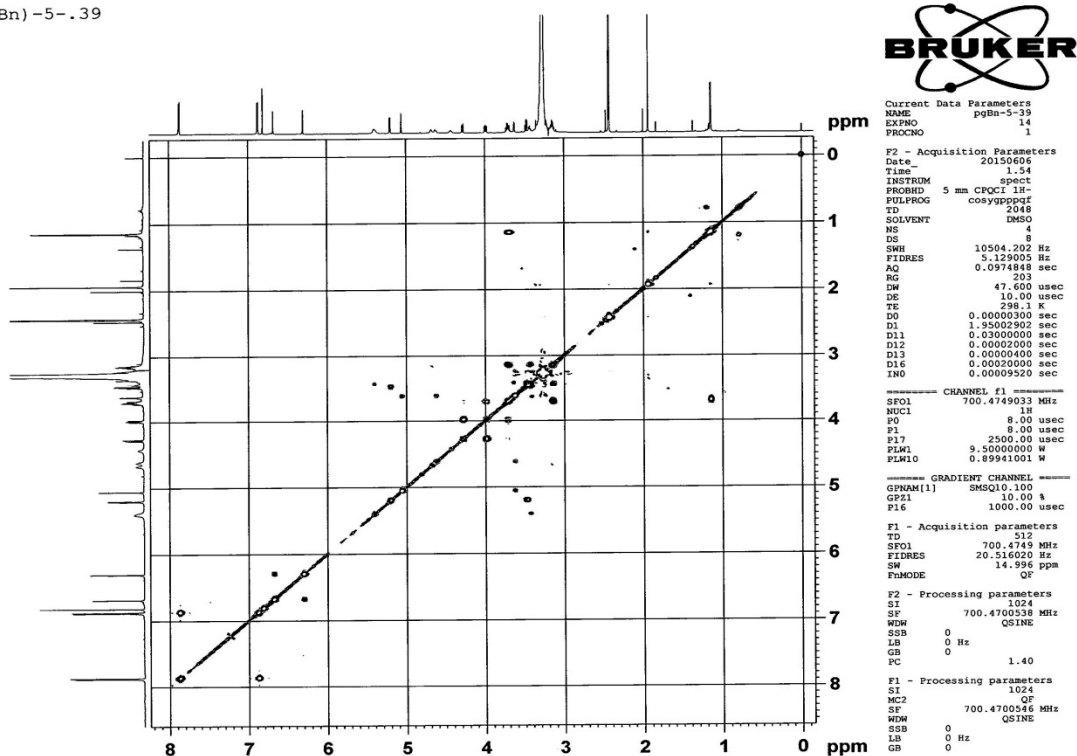

Figure S14.  $^1\text{H}$ - $^1\text{H}$  COSY spectrum of compound **2** (DMSO- $d_6$ , 700 MHz).

pg (Bn) -5-.39

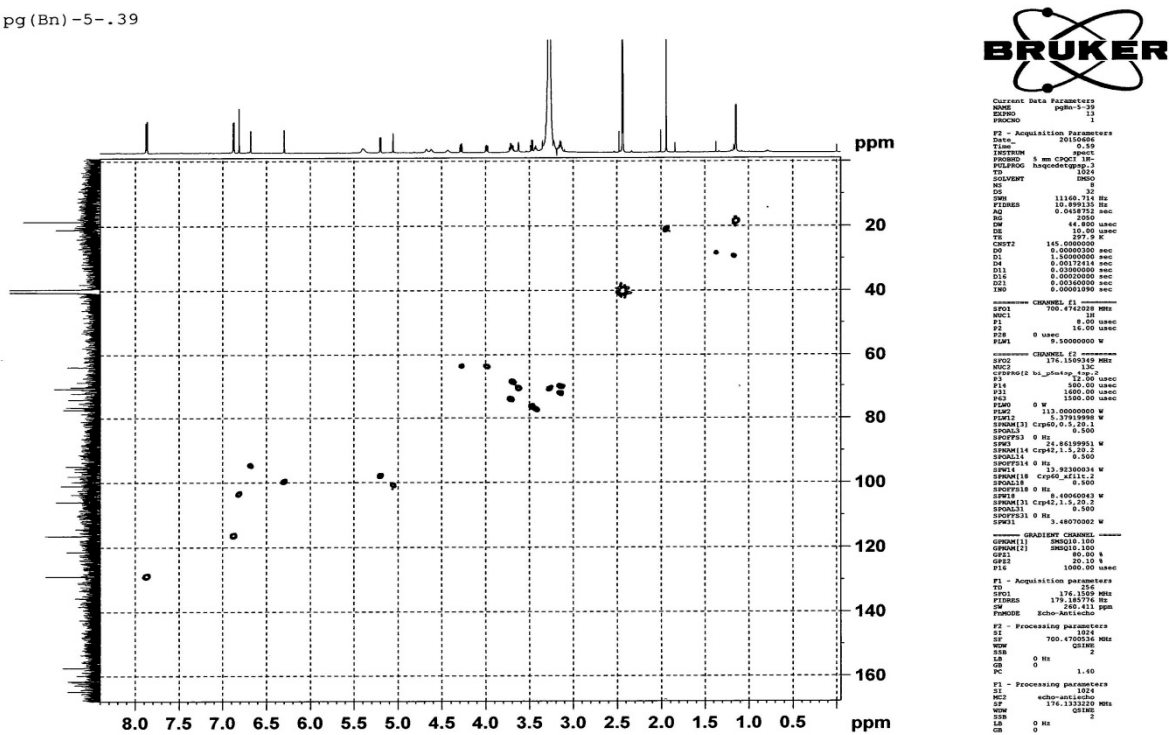

Figure S15. HSQC spectrum of compound **2** (DMSO- $d_6$ , 700 MHz).

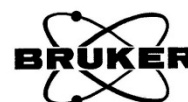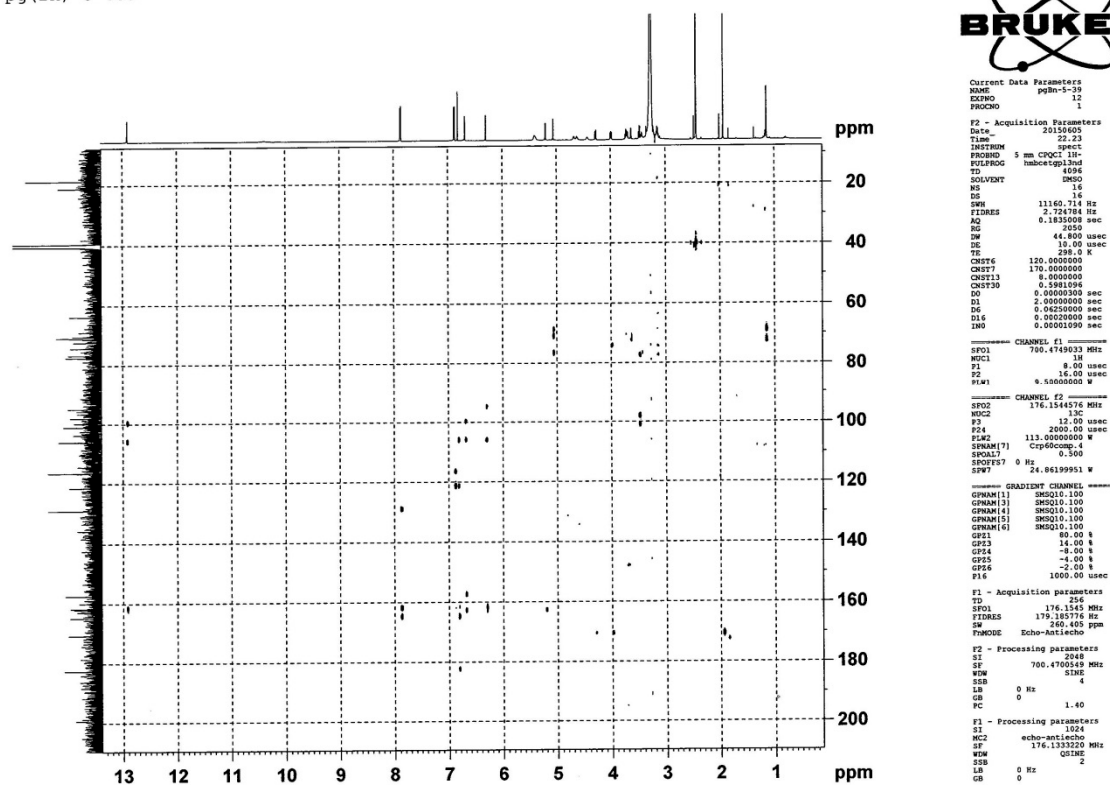

Figure S16. HMBC spectrum of compound **2** (DMSO- $d_6$ , 700 MHz).
